# Supplementary material for: A kinetic model of the central carbon metabolism for acrylic acid production in Escherichia coli
Source: PLoS Comput Biol. 2021 Mar 8;17(3):e1008704. doi: 10.1371/journal.pcbi.1008704 (PMC7971886; doi:10.1371/journal.pcbi.1008704)
Supplement: S1 Table — (XLSX) [file pcbi.1008704.s008.xlsx]

## Sheet: Sheet1
Model ID	Pathway	Carbon Source	End Product	Metabolites	Reactions	Biomodels ID
3HP_Glc_Gly	Glycerol	Glucose	3-HP	93	89	MODEL2010030004
3HP_Gly_Gly	Glycerol	Glycerol	3-HP	94	93	MODEL2010030005
AA_Glc_Gly	Glycerol	Glucose	AA	96	92	MODEL2010040003
AA_Gly_Gly	Glycerol	Glycerol	AA	97	96	MODEL2010040005
3HP_Glc_Mcoa	Malonyl-CoA	Glucose	3-HP	90	89	MODEL2010030006
3HP_Gly_ Mcoa	Malonyl-CoA	Glycerol	3-HP	91	91	MODEL2010030008
AA_Glc_ Mcoa	Malonyl-CoA	Glucose	AA	93	92	MODEL2010040006
AA_Gly_ Mcoa	Malonyl-CoA	Glycerol	AA	94	94	MODEL2010040007
3HP_Glc_Ba	β-alanine	Glucose	3-HP	90	89	MODEL2010030002
3HP_Gly_ Ba	β-alanine	Glycerol	3-HP	91	91	MODEL2010030003
AA_Glc_ Ba	β-alanine	Glucose	AA	93	92	MODEL2010040001
AA_Gly_ Ba	β-alanine	Glycerol	AA	94	94	MODEL2010040002
